# Supplementary material
Source: PubMed Central journal article supplement (PMC10323887)
Supplement: djad050_supplementary_data.pdf [file djad050_supplementary_data.pdf]

# Supplement Figure: CONSORT Flow Diagram

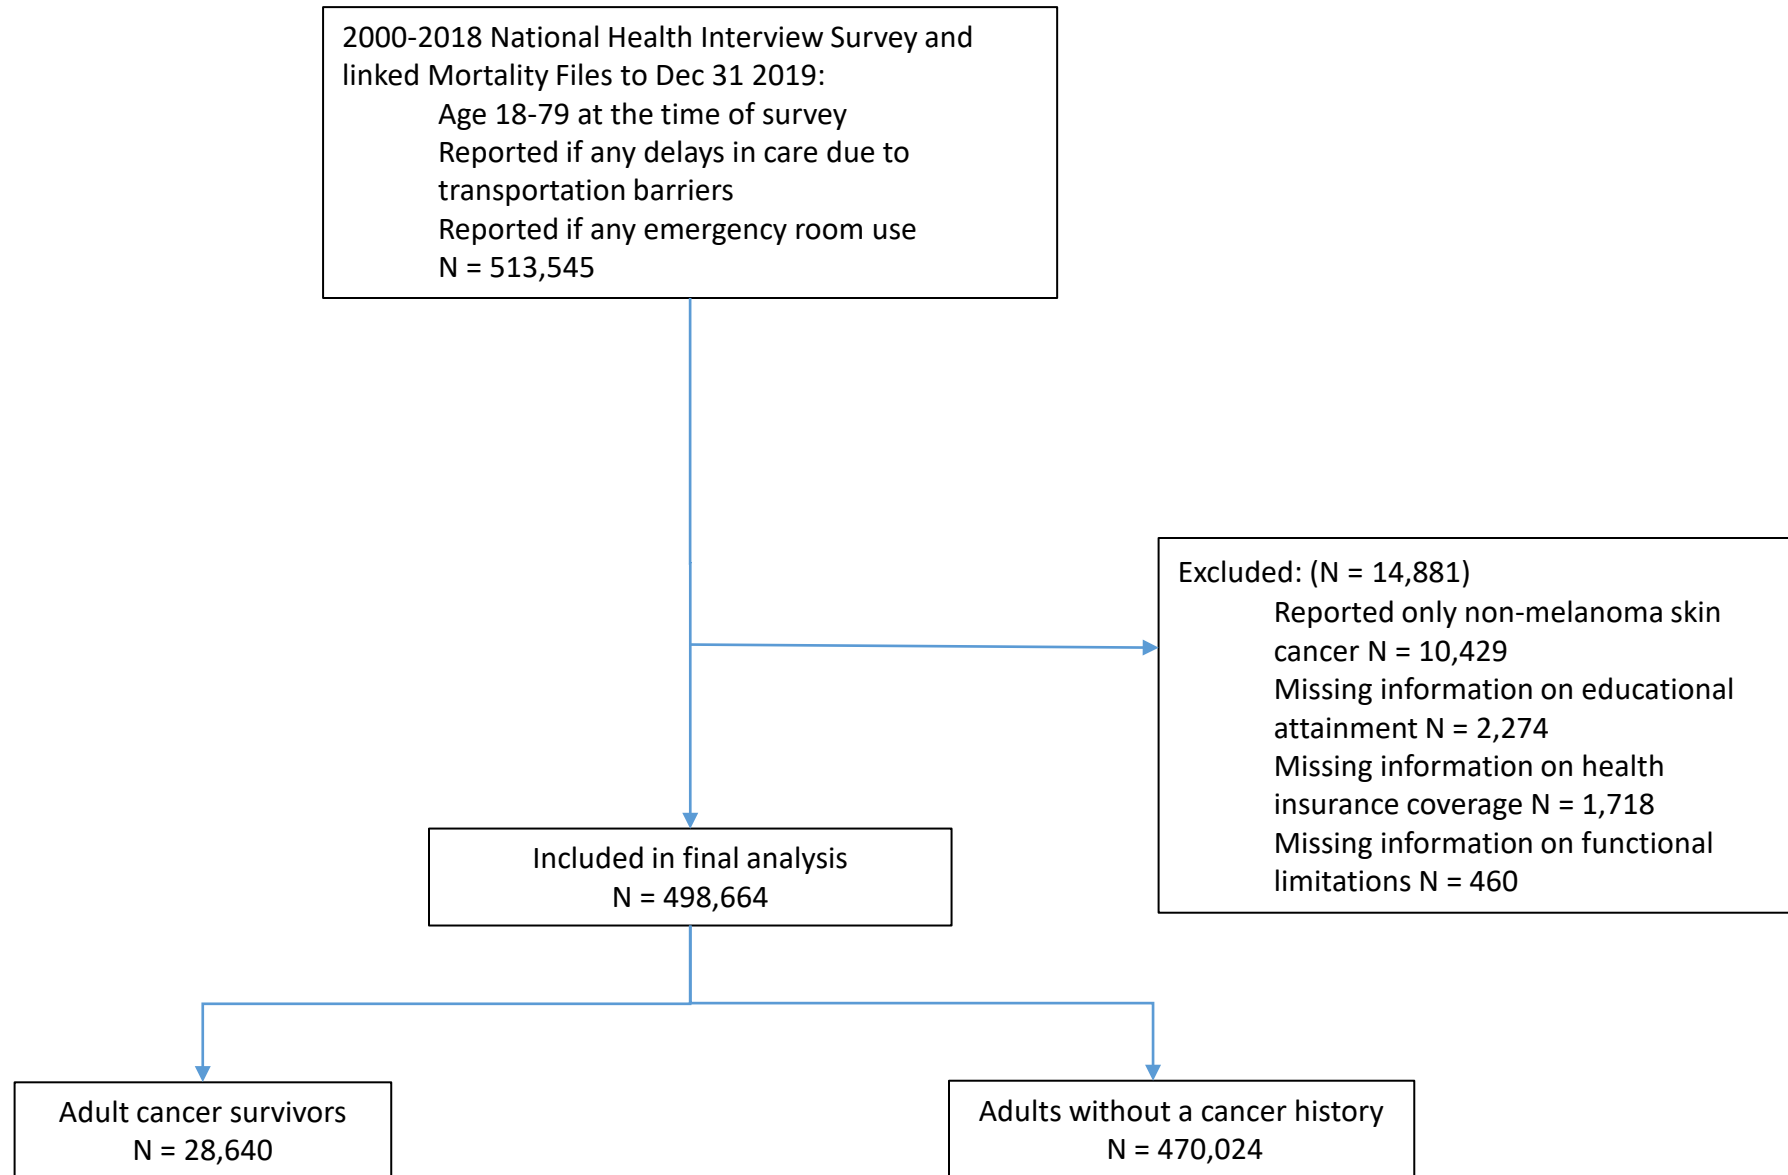

**Supplementary Table 1. Association of Transportation Barriers with Frequent Emergency Room Use (3 Times or More) among US Adults with and without a History of Cancer**

| Cancer History | Delay in Care Due to Lack of Transportation <sup>a</sup> | Frequent ER Use <sup>b</sup> /No. | Weighted % | Odds ratio (95%CI) | p <sup>c</sup> |
|----------------|----------------------------------------------------------|-----------------------------------|------------|--------------------|----------------|
| Yes            | Yes                                                      | 170/988                           | 18.3       | 3.19 (2.49, 4.10)  | <.0001         |
|                | No                                                       | 1125/27652                        | 3.9        | 1.77 (1.63, 1.92)  | <.0001         |
| No             | Yes                                                      | 1203/9685                         | 12.3       | 2.40 (2.18, 2.63)  | <.0001         |
|                | No                                                       | 8482/460339                       | 1.7        | Ref                |                |

**Data Source: 2000 – 2018 National Health Interview Survey (NHIS) and 2019 NHIS linked Mortality Files**

**a. Delays in care due to transportation barriers were measured by a question "Have you delayed getting care in the past 12 months because you did not have transportation?"**

**b. Frequent ER Use was defined by 3 or more visit in the past 12 months.**

**c. Multivariable logistic regression model was adjusted for age (in 5-year intervals), sex, race and ethnicity, educational attainment, health insurance, comorbidities, region, survey year era, and functional limitations.**

**Supplementary Table 2. Association of Transportation Barriers with Cause-Specific Mortality Risk among Long-term Cancer Survivors (5 or More Years Post Diagnosis)**

| Cause of Death | Delay in Care Due to Lack of Transportation <sup>a</sup> | Event/No.  | Weighted % | Hazard ratio (95%CI) | p <sup>b</sup> |
|----------------|----------------------------------------------------------|------------|------------|----------------------|----------------|
| All-Cause      | Yes                                                      | 166/545    | 28.5       | 1.27 (1.02, 1.57)    | 0.03           |
|                | No                                                       | 3474/14843 | 21.9       | Ref                  |                |
| Cancer         | Yes                                                      | 60/545     | 10.9       | 1.72 (1.22, 2.43)    | 0.002          |
|                | No                                                       | 1254/14843 | 8.0        | Ref                  |                |

**Data Source: 2000 – 2018 National Health Interview Survey (NHIS) and 2019 NHIS linked Mortality Files**  
**Cancer deaths identified as ICD-10 C00-C97 as underlying cause of death**

*a.* Delays in care due to transportation barriers were measured by a question "Have you delayed getting care in the past 12 months because you did not have transportation?"

*b.* Multivariable Cox proportional hazards regression model used age as the time scale and adjusted for sex, race and ethnicity, education, health insurance, comorbidities, region, survey year era, functional limitations, time since cancer diagnosis, and cancer types (breast, colorectal, prostate, and others)
